# Supplementary material for: Persistent soil carbon enhanced in Mollisols by well-managed grasslands but not annual grain or dairy forage cropping systems
Source: PubMed Central journal article supplement — Proc Natl Acad Sci U S A. 2022 Feb 10;119(7):e2118931119. doi: 10.1073/pnas.2118931119 (PMC8851490; doi:10.1073/pnas.2118931119), 2022-02-10
Supplement: pnas.2118931119.sapp.pdf [file pnas.2118931119.sapp.pdf]

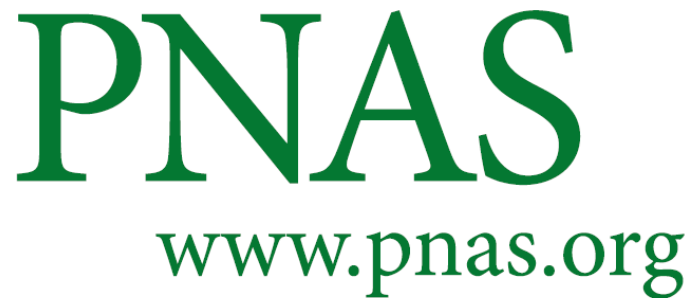

**Supplementary Information for**

**Persistent soil carbon enhanced in Mollisols by well-managed grasslands but not annual grain or dairy forage cropping systems**

Yichao Rui <sup>1,2\*</sup>, Randall D. Jackson <sup>3</sup>, M. Francesca Cotrufo <sup>4</sup>, Gregg R. Sanford <sup>3</sup>, Brian J. Spiesman <sup>5</sup>, Leonardo Deiss <sup>6</sup>, Steve W. Culman <sup>6</sup>, Chao Liang <sup>7</sup>, Matthew D. Ruark <sup>1</sup>

<sup>1</sup> Department of Soil Science, University of Wisconsin-Madison, Madison, WI 53706, USA.

<sup>2</sup> Rodale Institute, 611 Siegfriedale Rd, Kutztown, PA 19530, USA.

<sup>3</sup> Department of Agronomy, University of Wisconsin-Madison, WI 53706, USA.

<sup>4</sup> Department of Soil and Crop Science, Colorado State University, Fort Collins, CO 80521, USA.

<sup>5</sup> Department of Entomology, Kansas State University, Manhattan, KS 66506, USA.

<sup>6</sup> School of Environment and Natural Resources, The Ohio State University, Wooster, OH 44691, USA.

<sup>7</sup> Institute of Applied Ecology, Chinese Academy of Sciences, Shenyang 110016, P.R. China.

**Email:** [yichaorui@gmail.com](mailto:yichaorui@gmail.com)

**This PDF file includes:**

Figure S1 to S3

Tables S1 to S8

SI References

## annual grain systems

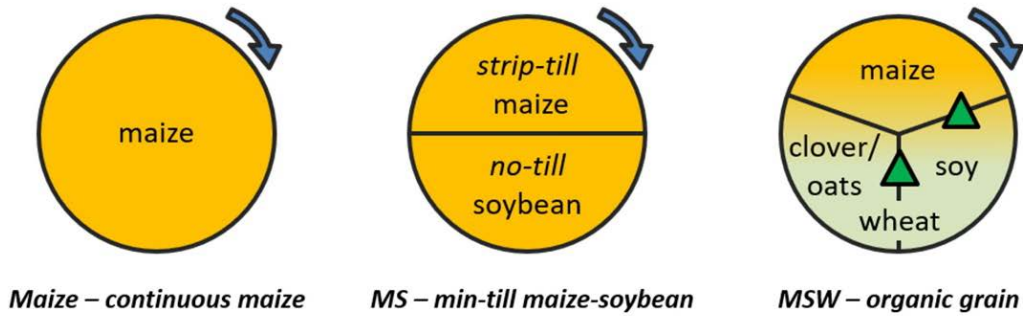

## perennial forage systems

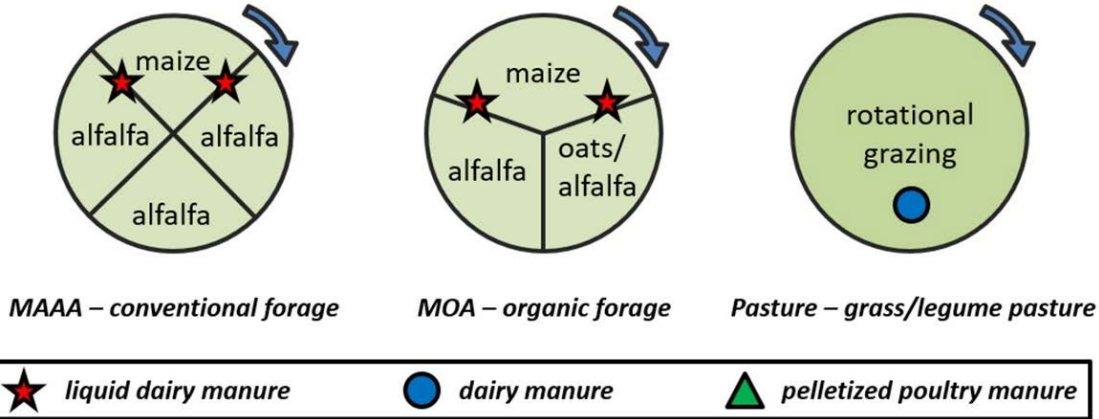

**Fig. S1. The six cropping systems at the Wisconsin Integrated Cropping Systems Trial (WICST).** These systems are broadly representative of the major agricultural land use on the Mollisols of the Midwestern US. The three annual grain systems include continuous maize (Maize), a maize-soybean rotation (MS), and an organically managed maize-soybean-wheat (MSW) rotation; the perennial forage systems include a maize-alfalfa-alfalfa-alfalfa rotation (MAAA), and organically managed maize-oats/alfalfa-alfalfa rotation (MOA), and a well-managed grazed pasture (Pasture).

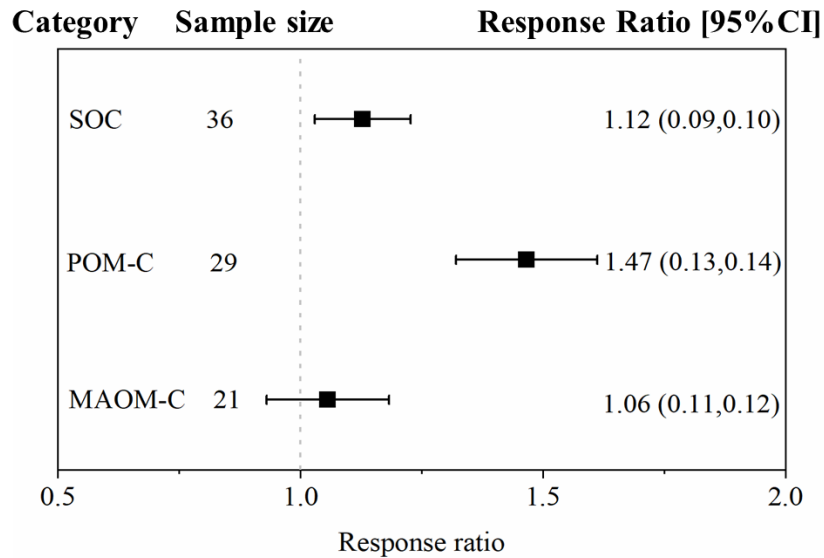

**Fig. S2. Effects of alternative agricultural practices versus conventional practices on soil organic carbon (SOC), particulate organic matter-carbon (POM-C) and mineral-associated organic matter-carbon (MAOM-C) based on a meta-analysis.** We reviewed and extracted data from 17 published studies in world's Mollisols. Comparisons of practices in these studies included no-till vs. conventional tillage, diversify crop rotation with legumes vs. monoculture, manure vs. synthetic nutrient additions, cover crops vs. no cover crops, or combinations of these practices. The length of experiments ranged from 4 to 60 years. Effect sizes of response ratio are mean and 95% confidence interval.

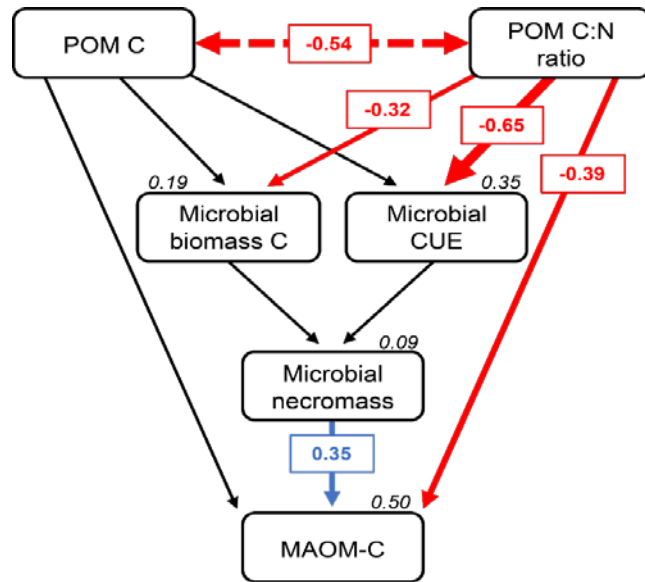

**Fig. S3. Piecewise structural equation modeling (SEM) diagram showing the relationships among particulate organic matter (POM), the soil microbial traits, and mineral-associated organic matter (MAOM).** Large boxes indicate variable names. Solid arrows indicate direct effects between variables. The dashed double-headed arrows represent correlations. Blue indicates a significant positive effect, red negative, and black indicates a non-significant effect. Values over arrows indicate the strength of standardized path coefficients or correlation coefficient. Values above boxes in italics indicate the  $R^2$  for endogenous variables.

**Table S1. Estimated carbon inputs, N fertilizer application, and tillage intensity of systems at Wisconsin Integrated Cropping Systems Trial (WICST).** Maize: continuous maize, MS: maize-soybean with minimum tillage, MSW: organic maize-soybean-winter wheat, MAAA: maize followed by three years of alfalfa, MOA: organic maize-oat/alfalfa-alfalfa, and Pasture: well-managed grazed cool-season pasture. Numbers are averaged over crop rotation phases of each of the systems.

|                | Estimated annual C input (kg C ha <sup>-1</sup> ) |                         |              |       | Mineral fertilizer N (Kg N ha <sup>-1</sup> ) | Tillage score <sup>2</sup> | Relative tillage intensity |
|----------------|---------------------------------------------------|-------------------------|--------------|-------|-----------------------------------------------|----------------------------|----------------------------|
|                | Aboveground plant input                           | Belowground plant input | Manure input | Total |                                               |                            |                            |
| <b>Maize</b>   | 4154                                              | 2448                    | 0            | 6601  | 162                                           | 3.00                       | 0.53                       |
| <b>MS</b>      | 3185                                              | 1814                    | 0            | 4999  | 74                                            | 0.15                       | 0.03                       |
| <b>MSW</b>     | 2323                                              | 1290                    | 243          | 3857  | 0                                             | 5.67                       | 1.00                       |
| <b>MAAA</b>    | 1807                                              | 5465                    | 1144         | 8416  | 2                                             | 1.75                       | 0.31                       |
| <b>MOA</b>     | 1964                                              | 5071                    | 1294         | 8329  | 0                                             | 3.67                       | 0.65                       |
| <b>Pasture</b> | 620                                               | 11369                   | 904          | 12894 | 32                                            | 0.00                       | 0.00                       |

<sup>1</sup>Carbon input estimates based on annual yield and green manure data coupled with harvest index and root shoot coefficients from Allmaras et al. 2004 (1), Johnson et al. 2006 (2), and Bolinder et al. 2007 (3).

<sup>2</sup>System tillage score based on number of tillage passes per cropping system phase averaged across all phases.

**Table S2. Soil organic carbon (C) and nitrogen (N) content, and C:N ratio of bulk soil, particulate organic matter (POM) and mineral associated organic matter (MAOM) by management treatment for the 0-30cm depth, and across management treatments for the 0-15 and 15-30 cm depths in the Wisconsin Integrated Cropping Systems Trial (WICST). Different letters indicate significant differences at  $\alpha= 0.05$  among management treatments, or depths.**

|                             | Bulk Soil                         |                                   |              | POM                               |                                   |              | MAOM                              |                                   |              |
|-----------------------------|-----------------------------------|-----------------------------------|--------------|-----------------------------------|-----------------------------------|--------------|-----------------------------------|-----------------------------------|--------------|
|                             | C<br>(mg g <sup>-1</sup><br>soil) | N<br>(mg g <sup>-1</sup><br>soil) | C:N<br>ratio | C<br>(mg g <sup>-1</sup><br>soil) | N<br>(mg g <sup>-1</sup><br>soil) | C:N<br>ratio | C<br>(mg g <sup>-1</sup><br>soil) | N<br>(mg g <sup>-1</sup><br>soil) | C:N<br>ratio |
| <b>Management treatment</b> |                                   |                                   |              |                                   |                                   |              |                                   |                                   |              |
| Maize                       | 21.3 b                            | 1.78 c                            | 11.8 a       | 2.62 b                            | 0.16 c                            | 17.4 a       | 17.4 b                            | 1.62 c                            | 10.7 a       |
| MS                          | 21.3 bc                           | 1.81 c                            | 11.7 ab      | 2.54 b                            | 0.15 c                            | 17.1 a       | 16.8 b                            | 1.60 c                            | 10.5 ab      |
| MSW                         | 20.1 c                            | 1.82 c                            | 11.0 c       | 2.94 ab                           | 0.19 bc                           | 15.7 b       | 17.0 b                            | 1.67 bc                           | 10.2 c       |
| MAAA                        | 22.5 bc                           | 2.01 bc                           | 11.2 bc      | 2.90 ab                           | 0.21 ab                           | 14.1 c       | 19.2 b                            | 1.88 b                            | 10.2 bc      |
| MOA                         | 23.7 ab                           | 2.15 b                            | 10.9 c       | 3.31 a                            | 0.23 ab                           | 15.0 bc      | 17.8 b                            | 1.80 bc                           | 9.8 d        |
| Pasture                     | 29.0 a                            | 2.46 a                            | 11.7 ab      | 3.48 a                            | 0.25 a                            | 14.7 c       | 23.5 a                            | 2.27 a                            | 10.4 bc      |
| <b>Depth</b>                |                                   |                                   |              |                                   |                                   |              |                                   |                                   |              |
| 0-15cm                      | 26.6 a                            | 2.28 a                            | 11.7 a       | 4.26 a                            | 0.29 a                            | 16.3 a       | 20.1 a                            | 1.98 a                            | 10.1 b       |
| 15-30cm                     | 19.4 b                            | 1.73 b                            | 11.1 b       | 1.68 b                            | 0.11 b                            | 15.0 b       | 17.2 b                            | 1.64 b                            | 10.5 a       |
| <b>P-value</b>              |                                   |                                   |              |                                   |                                   |              |                                   |                                   |              |
| Treatment (T)               | <0.001                            | <0.001                            | 0.009        | 0.024                             | <0.001                            | <0.001       | <0.001                            | <0.001                            | <0.001       |
| Depth (D)                   | <0.001                            | <0.001                            | 0.003        | <0.001                            | <0.001                            | <0.001       | 0.001                             | <0.001                            | 0.002        |
| T × D                       | 0.985                             | 0.991                             | 0.354        | 0.639                             | 0.257                             | 0.869        | 0.376                             | 0.309                             | 0.41         |

**Table S3. The responses of soil organic carbon (SOC), particulate organic matter-carbon (POM-C), or mineral-associated organic matter-carbon (MAOM-C) to alternative practices on the world’s Mollisols reported by 17 publications. “√” means significant treatment effects compared with control (conventional practice); “ns” means no significant difference between treatment and control. Bold values indicated data reported as Mg C ha<sup>-1</sup>.**

| Study # | Country       | Crop                                      | Duration of trial (yrs) | Treatments                                                | Soil depth (cm) | Treatment effects |       |        | SOC (%)     |             | POM-C (%)   |             | MAOM-C (%)  |             | Reference |
|---------|---------------|-------------------------------------------|-------------------------|-----------------------------------------------------------|-----------------|-------------------|-------|--------|-------------|-------------|-------------|-------------|-------------|-------------|-----------|
|         |               |                                           |                         |                                                           |                 | SOC               | POM-C | MAOM-C | Control     | Alternative | Control     | Alternative | Control     | Alternative |           |
| 1       | Argentina     | Sunflower-wheat-maize-soybean             | 22                      | No-till vs. Till                                          | 0-10            | √                 | √     | ns     | 1.92        | 2.61        | 0.19        | 0.30        | 0.90        | 0.92        | (4)       |
|         |               |                                           |                         |                                                           | 10-20           | ns                | ns    | ns     | 1.68        | 1.61        | 0.13        | 0.14        | 0.93        | 1.06        |           |
| 2       | Uruguay       | Continuous cropping                       | 10                      | No-till vs. Till                                          | 0-6             | ns                | √     | ns     | 2.20        | 2.30        | <b>1.92</b> | <b>2.42</b> | <b>14.5</b> | <b>15.0</b> | (5, 6)    |
|         |               |                                           |                         |                                                           | 6-12            | ns                | ns    | ns     | 2.00        | 1.90        | <b>0.82</b> | <b>0.60</b> | <b>14.5</b> | <b>13.8</b> |           |
|         |               |                                           |                         |                                                           | 12-18           | ns                | ns    | ns     | 1.70        | 1.80        | <b>0.38</b> | <b>0.48</b> | <b>12.8</b> | <b>13.0</b> |           |
| 3       | Argentina     | Maize-soybean-wheat                       | 15                      | No-till vs. Till                                          | 0-5             | ns                | ns    | ns     | 3.30        | 3.56        | 0.30        | 0.54        | 2.90        | 3.04        | (7)       |
|         |               |                                           |                         |                                                           | 5-20            | √                 | ns    | ns     | 3.02        | 3.29        | 0.29        | 0.49        | 2.74        | 2.80        |           |
| 4       | Argentina     | Maize-sunflower-wheat                     | 4                       | No-till vs. Till                                          | 0-5             | ns                | √     | ns     | 3.29        | 3.47        | 0.61        | 0.82        | 2.65        | 2.69        | (8)       |
|         |               |                                           |                         |                                                           | 5-20            | ns                | ns    | ns     | 3.15        | 3.08        | 0.52        | 0.59        | 2.59        | 2.62        |           |
| 5       | Argentina     | Wheat-soybean-wheat-maize-maize-sunflower | 4                       | No-till vs. Till                                          | 0-7.5           | √                 | √     | √      | 2.35        | 2.89        | 0.19        | 0.39        | 2.16        | 2.50        | (9)       |
|         |               |                                           |                         |                                                           | 7.5-15          | ns                | √     | ns     | 2.39        | 2.50        | 0.22        | 0.15        | 2.17        | 2.35        |           |
| 6       | Argentina     | Maize-soybean-wheat                       | 20                      | No-till vs. Till                                          | 0-5             | √                 | √     | ns     | <b>11.9</b> | <b>15.4</b> | <b>1.30</b> | <b>6.20</b> | <b>10.6</b> | <b>9.20</b> | (10)      |
|         |               |                                           |                         |                                                           | 5-20            | ns                | ns    | ns     | <b>46.5</b> | <b>47.2</b> | <b>6.80</b> | <b>8.60</b> | <b>39.7</b> | <b>38.6</b> |           |
| 7       | United States | Maize-soybean                             | 24                      | Diversify rotation with legumes; Organic vs. conventional | 0-25            |                   | √     |        |             | 0.25        | 0.35        |             |             | (11)        |           |
| 8       | United States | Maize-soybean                             | 8                       | Diversify rotation with legumes                           | 0-10            | ns                | ns    |        | <b>28.3</b> | <b>27.0</b> | <b>2.91</b> | <b>2.35</b> |             |             | (12)      |
|         |               |                                           |                         |                                                           | 10-20           | ns                | √     |        | <b>31.0</b> | <b>31.6</b> | <b>0.89</b> | <b>2.03</b> |             |             |           |
| 9       | United States | Maize-soybean                             | 10                      | Diversify rotation with legumes                           | 0-20            | ns                | ns    |        | 2.65        | 2.69        | 0.22        | 0.26        | 2.43        | 2.43        | (13)      |
| 10      | United States | Maize-soybean                             | 22                      | Diversify rotation with legumes                           | 0-15            | ns                | √     |        | 3.28        | 3.85        | 0.42        | 0.52        |             |             | (14)      |
| 11      | United States | Site 1 Maize-soybean                      | 60                      |                                                           | 0-15            | √                 | √     | ns     | <b>45.4</b> | <b>52.7</b> |             |             |             |             | (15)      |

|    |           |                    |               |    |                                                                                                           |       |    |    |      |      |      |      |      |      |      |      |      |      |      |      |
|----|-----------|--------------------|---------------|----|-----------------------------------------------------------------------------------------------------------|-------|----|----|------|------|------|------|------|------|------|------|------|------|------|------|
|    |           |                    |               |    | 15-30                                                                                                     | ns    | ns | ns | 40.3 | 47.1 |      |      |      |      |      |      |      |      |      |      |
|    |           | Site 2             | Maize-soybean | 35 | Diversify rotation with legumes                                                                           | 0-15  | ns | ns | ns   | 31.9 | 36.3 |      |      |      |      |      |      |      |      |      |
|    |           |                    |               |    |                                                                                                           | 15-30 | ns | ns | ns   | 27.6 | 29.0 |      |      |      |      |      |      |      |      |      |
|    |           | Site 3             | Maize-soybean | 12 |                                                                                                           | 0-15  | ns | ns | ns   | 47.7 | 43.8 |      |      |      |      |      |      |      |      |      |
|    |           |                    |               |    | 15-30                                                                                                     | ns    | ns | ns | 42.7 | 40.6 |      |      |      |      |      |      |      |      |      |      |
| 12 | Argentina | Continuous soybean |               | 8  | Oat CC vs. No CC                                                                                          | 0-5   | √  | √  | ns   | 2.35 | 2.79 | 0.59 | 0.90 | 1.76 | 1.89 | (16) |      |      |      |      |
|    |           |                    |               |    |                                                                                                           | 5-10  | ns | ns | ns   | 2.23 | 2.29 |      |      |      |      |      |      |      |      |      |
|    |           |                    |               |    |                                                                                                           | 10-20 | ns | ns | ns   | 2.07 | 2.01 |      |      |      |      |      |      |      |      |      |
| 13 | China     | Maize-soybean      |               | 14 | Manure vs. NPK                                                                                            | 0-20  | √  | √  | ns   | 2.77 | 3.40 | 0.26 | 0.52 | 2.51 | 2.88 | (17) |      |      |      |      |
| 14 | India     | Rice-Wheat         |               | 42 | NPK+Manure vs. NPK                                                                                        | 0-15  | √  | √  |      | 1.81 | 2.68 | 0.41 | 0.75 |      |      | (18) |      |      |      |      |
|    |           |                    |               |    |                                                                                                           | 15-30 | √  | √  |      | 1.14 | 1.56 |      |      |      |      |      | 0.25 | 0.45 |      |      |
| 15 | China     | Maize              |               | 21 | NPK+Manure vs. NPK                                                                                        | 0-10  | √  | √  |      | 1.50 | 2.36 | 0.28 | 0.68 |      |      | (19) |      |      |      |      |
|    |           |                    |               |    |                                                                                                           | 10-20 | √  | √  |      | 1.32 | 2.06 |      |      |      |      |      | 0.22 | 0.48 |      |      |
| 16 | China     | Maize              |               | 24 | Natural fallow vs. Continuous cropping                                                                    | 0-20  | √  | √  | ns   | 2.82 | 3.21 | 1.03 | 1.21 | 1.79 | 2.00 | (20) |      |      |      |      |
| 17 | Argentina | Site 1             | Maize-soybean | 13 | Cover crop, diverse rotation, minimal use of agrochemicals vs. no CC, monoculture, heavy use of chemicals | 0-20  | √  | √  | ns   | 1.05 | 1.29 | 0.32 | 0.49 | 0.73 | 0.80 | (21) |      |      |      |      |
|    |           | Site 2             |               | 28 |                                                                                                           | 0-20  | √  | √  | ns   | 1.57 | 1.79 |      |      |      |      |      | 0.28 | 0.40 | 1.29 | 1.39 |
|    |           | Site 3             |               | 6  |                                                                                                           | 0-20  | N  | N  | ns   | 1.46 | 1.54 |      |      |      |      |      | 0.27 | 0.30 | 1.19 | 1.24 |
|    |           | Site 4             |               | 13 |                                                                                                           | 0-20  | √  | ns | √    | 2.15 | 3.00 |      |      |      |      |      | 0.29 | 0.43 | 1.86 | 2.57 |



**Table S4. Microbial biomass C (MBC), microbial C-use efficiency (CUE), concentrations of amino sugars including glucosamine (GluN), Muramic Acid (MurA), Galactosamine (GalN), and Mannose (ManM) and the total of the above four amino sugars, and the ratio of Glucosamine/Muramic Acid.** Different letters show significant differences at  $\alpha = 0.05$ .

|                             | <b>MBC<br/>(mg kg<sup>-1</sup>)</b> | <b>Microbial<br/>CUE</b> | <b>GluN<br/>(<math>\mu\text{g g}^{-1}</math>)</b> | <b>MurA<br/>(<math>\mu\text{g g}^{-1}</math>)</b> | <b>GalN<br/>(<math>\mu\text{g g}^{-1}</math>)</b> | <b>ManM<br/>(<math>\mu\text{g g}^{-1}</math>)</b> | <b>Total amino<br/>sugars<br/>(<math>\mu\text{g g}^{-1}</math>)</b> | <b>GluN: MurA</b> |
|-----------------------------|-------------------------------------|--------------------------|---------------------------------------------------|---------------------------------------------------|---------------------------------------------------|---------------------------------------------------|---------------------------------------------------------------------|-------------------|
| <b>Management Treatment</b> |                                     |                          |                                                   |                                                   |                                                   |                                                   |                                                                     |                   |
| Maize                       | 321 c                               | 0.20 d                   | 767                                               | 95.8                                              | 258 b                                             | 19.8 bc                                           | 1140 b                                                              | 7.99 c            |
| MS                          | 309 c                               | 0.20 d                   | 882                                               | 86.6                                              | 316 ab                                            | 23.8 bc                                           | 1308 ab                                                             | 9.99 ab           |
| MSW                         | 591 b                               | 0.22 cd                  | 793                                               | 77.2                                              | 257 b                                             | 19.0 c                                            | 1146 b                                                              | 10.3 a            |
| MAAA                        | 543 b                               | 0.36 b                   | 964                                               | 110                                               | 332 ab                                            | 26.9 b                                            | 1433 ab                                                             | 8.93 bc           |
| MOA                         | 842 a                               | 0.27 c                   | 910                                               | 90.1                                              | 310 b                                             | 26.8 b                                            | 1336 ab                                                             | 10.3 a            |
| Pasture                     | 642 b                               | 0.45 a                   | 1095                                              | 100                                               | 396 a                                             | 40.8 a                                            | 1632 a                                                              | 10.9 a            |
| <b>Depth</b>                |                                     |                          |                                                   |                                                   |                                                   |                                                   |                                                                     |                   |
| 0-15cm                      | 577                                 | 0.29                     | 909                                               | 95.7                                              | 334                                               | 23.1 b                                            | 1362                                                                | 9.43              |
| 15-30cm                     | 505                                 | 0.27                     | 894                                               | 91.1                                              | 289                                               | 29.2 a                                            | 1303                                                                | 10.0              |
| <b>P-value</b>              |                                     |                          |                                                   |                                                   |                                                   |                                                   |                                                                     |                   |
| Treatment (T)               | <0.001                              | <0.001                   | 0.071                                             | 0.084                                             | 0.020                                             | <0.001                                            | 0.05                                                                | <0.001            |
| Depth (D)                   | 0.115                               | 0.430                    | 0.818                                             | 0.465                                             | 0.069                                             | 0.006                                             | 0.545                                                               | 0.069             |
| T × D                       | 0.011                               | 0.071                    | 0.045                                             | 0.085                                             | 0.092                                             | 0.001                                             | 0.05                                                                | 0.018             |

**Table S5. Pearson correlation coefficients of measured variables.** Variables include particulate organic matter-carbon (POM-C), C:N ratio of POM, mineral-associated organic matter-carbon (MAOM-C), microbial C-use efficiency (CUE), total amino sugars (AS) content, relative proportion of aliphatic and aromatic C functional groups contained in MAOM, and activity of polyphenol oxidase.

| Variables            | POM-C    | POM C:N ratio | MAOM-C   | MBC     | CUE     | Total AS | GluN:MurA | Aliphatic C | Aromatic C | PPO |
|----------------------|----------|---------------|----------|---------|---------|----------|-----------|-------------|------------|-----|
| <b>POM-C</b>         | 1        |               |          |         |         |          |           |             |            |     |
| <b>POM C:N ratio</b> | -0.54*** | 1             |          |         |         |          |           |             |            |     |
| <b>MAOM-C</b>        | 0.48***  | -0.59***      | 1        |         |         |          |           |             |            |     |
| <b>MBC</b>           | 0.34*    | -0.41**       | 0.25     | 1       |         |          |           |             |            |     |
| <b>CUE</b>           | 0.23     | -0.58***      | 0.48***  | 0.24    | 1       |          |           |             |            |     |
| <b>Total AS</b>      | 0.25     | -0.29*        | 0.51***  | 0.17    | 0.28    | 1        |           |             |            |     |
| <b>GluN:MurA</b>     | -0.03    | -0.09         | 0.00     | 0.24    | 0.15    | 0.34*    | 1         |             |            |     |
| <b>Aliphatic C</b>   | 0.62***  | -0.64***      | 0.94***  | 0.35*   | 0.44**  | 0.47**   | 0.02      | 1           |            |     |
| <b>Aromatic C</b>    | -0.72*** | 0.68***       | -0.88*** | -0.39** | -0.41** | -0.47**  | -0.01     | -0.98***    | 1          |     |
| <b>PPO</b>           | 0.55***  | -0.21         | 0.11     | 0.57*** | -0.15   | 0.00     | 0.09      | 0.25        | -0.33      | 1   |

\*p<0.05, \*\*p<0.01, \*\*\*p<0.001.

**Table S6. C functional groups of mineral associated organic matter (MAOM) at 0-15 and 15-30 cm depths in the Wisconsin Integrated Cropping Systems Trial (WICST).** Aliphatic, aromatic, and C-O functional groups were determined from relative peak areas using diffuse reflectance infrared Fourier transform spectroscopy in the mid-infrared region (mid-DRIFTS). Different letters suggest significant differences at  $\alpha= 0.05$ .

|                             | Aliphatic C-H<br>(2930 cm <sup>-1</sup> ) | Aromatic C=C<br>(1620 cm <sup>-1</sup> ) | Aromatic C=C<br>(1530 cm <sup>-1</sup> ) | C-O<br>(1159 cm <sup>-1</sup> ) |
|-----------------------------|-------------------------------------------|------------------------------------------|------------------------------------------|---------------------------------|
| <b>Management Treatment</b> |                                           |                                          |                                          |                                 |
| Maize                       | 24.7 bc                                   | 55.0 ab                                  | 11.9 a                                   | 8.43 ab                         |
| MS                          | 23.2 c                                    | 55.7 a                                   | 12.3 a                                   | 8.83 a                          |
| MSW                         | 24.9 bc                                   | 54.8 ab                                  | 11.6 a                                   | 8.68 a                          |
| MAAA                        | 26.9 b                                    | 53.1 b                                   | 11.3 a                                   | 8.63 a                          |
| MOA                         | 26.0 bc                                   | 53.3 b                                   | 12.1 a                                   | 8.56 a                          |
| Pasture                     | 31.9 a                                    | 50.4 c                                   | 9.62 b                                   | 8.05 b                          |
| <b>Depth</b>                |                                           |                                          |                                          |                                 |
| 0-15cm                      | 28.7 a                                    | 51.6 b                                   | 11.4                                     | 8.23 b                          |
| 15-30cm                     | 23.8 b                                    | 55.8 a                                   | 11.6                                     | 8.83 a                          |
| <b>P-value</b>              |                                           |                                          |                                          |                                 |
| Treatment (T)               | <0.001                                    | <0.001                                   | 0.002                                    | 0.033                           |
| Depth (D)                   | <0.001                                    | <0.001                                   | 0.647                                    | <0.001                          |
| T x D                       | 0.270                                     | 0.216                                    | 0.020                                    | 0.092                           |

**Table S7. The activities of oxidative enzymes including polyphenol oxidase (PPO) and peroxidase (PER) and hydrolytic enzymes including  $\alpha$ -glucosidase (AG),  $\beta$ -glucosidase (BG),  $\beta$ -cellobiohydrolase (CBH), and N-acetylglucosaminidase (NAG). Different letters show significant differences at  $\alpha = 0.05$ .**

|                             | <b>PPO</b><br>( $\mu\text{mol h}^{-1} \text{g}^{-1}$ ) | <b>PER</b><br>( $\mu\text{mol h}^{-1} \text{g}^{-1}$ ) | <b>AG</b><br>( $\mu\text{mol h}^{-1} \text{g}^{-1}$ ) | <b>BG</b><br>( $\mu\text{mol h}^{-1} \text{g}^{-1}$ ) | <b>CBH</b><br>( $\mu\text{mol h}^{-1} \text{g}^{-1}$ ) | <b>NAG</b><br>( $\mu\text{mol h}^{-1} \text{g}^{-1}$ ) |
|-----------------------------|--------------------------------------------------------|--------------------------------------------------------|-------------------------------------------------------|-------------------------------------------------------|--------------------------------------------------------|--------------------------------------------------------|
| <b>Management Treatment</b> |                                                        |                                                        |                                                       |                                                       |                                                        |                                                        |
| Maize                       | 1.98 b                                                 | 4.09 b                                                 | 5.33 c                                                | 272 ab                                                | 82 ab                                                  | 84 ab                                                  |
| MS                          | 1.92 b                                                 | 4.47 b                                                 | 7.56 c                                                | 232 ab                                                | 68 b                                                   | 60 bc                                                  |
| MSW                         | 3.65 a                                                 | 3.69 b                                                 | 17.3 b                                                | 292 a                                                 | 78 ab                                                  | 80 ab                                                  |
| MAAA                        | 1.34 b                                                 | 4.56 b                                                 | 5.41 c                                                | 192 b                                                 | 65 b                                                   | 41 c                                                   |
| MOA                         | 5.16 a                                                 | 7.69 a                                                 | 25.4 a                                                | 330 a                                                 | 96 a                                                   | 103 a                                                  |
| Pasture                     | 1.74 b                                                 | 3.55 b                                                 | 8.34 c                                                | 259 ab                                                | 79 ab                                                  | 71 abc                                                 |
| <b>Depth</b>                |                                                        |                                                        |                                                       |                                                       |                                                        |                                                        |
| 0-15cm                      | 3.85 a                                                 | 4.90                                                   | 16.7 a                                                | 329 a                                                 | 106 a                                                  | 76                                                     |
| 15-30cm                     | 1.41 b                                                 | 4.45                                                   | 6.45 b                                                | 196 b                                                 | 50 b                                                   | 70                                                     |
| <b>P-value</b>              |                                                        |                                                        |                                                       |                                                       |                                                        |                                                        |
| Treatment (T)               | <0.001                                                 | 0.007                                                  | <0.001                                                | 0.117                                                 | 0.234                                                  | 0.015                                                  |
| Depth (D)                   | <0.001                                                 | 0.487                                                  | <0.001                                                | <0.001                                                | <0.001                                                 | 0.523                                                  |
| T x D                       | 0.008                                                  | 0.815                                                  | 0.223                                                 | 0.804                                                 | 0.400                                                  | 0.479                                                  |

**Table S8. Cropping system details between 1993 and 2018 at the Wisconsin Integrated Cropping Systems Trial (WICST), Arlington, WI, USA.**

| System code <sup>1</sup> | Crop species | Crop phase                      | Dry matter yield (Mg ha <sup>-1</sup> ) <sup>2</sup> | Tillage equipment <sup>3</sup> | Tillage passes per year | Annual N-P-K inputs <sup>4</sup> (kg ha <sup>-1</sup> ) | Input Source <sup>5</sup> |
|--------------------------|--------------|---------------------------------|------------------------------------------------------|--------------------------------|-------------------------|---------------------------------------------------------|---------------------------|
| <b>Maize</b>             | 1            | maize                           | 9.8                                                  | CP, FC                         | 3                       | 160-8-35                                                | F                         |
| <b>MS</b>                | 2            | maize                           | 10.1                                                 | ST                             | 0.3                     | 148-11-42                                               | F                         |
|                          |              | soybean                         | 3.3                                                  | NT                             | 0                       | 1-2-22                                                  |                           |
| <b>MSW</b>               | 5            | maize                           | 8.0                                                  | CP, FC, RH/TW                  | 7                       | 0-0-9 / 138-51-66 <sup>6</sup>                          | F, CPM                    |
|                          |              | soybean                         | 2.9                                                  | CP, FC, RH/TW                  | 6                       | 0-0-4 / 0-0-55                                          |                           |
|                          |              | wheat / cover crop <sup>7</sup> | 3.6 (2.5)                                            | CP, FC                         | 3                       | 0-0-0 / 55-19-63                                        |                           |
| <b>MAAA</b>              | 2            | maize                           | 11.0                                                 | CP, FC                         | 3                       | 88-31-160                                               | F, M1                     |
|                          |              | alfalfa                         | 5.8                                                  | CP, FC                         | 3                       | 100-29-155                                              |                           |
|                          |              | alfalfa                         | 11.4                                                 | --                             | 0                       | 0-1-96                                                  |                           |
|                          |              | alfalfa                         | 10.1                                                 | --                             | 0                       | 0-0-108                                                 |                           |
| <b>MOA</b>               | 3            | maize                           | 9.0                                                  | CP                             | 7                       | 71-20-121                                               | F, M1                     |
|                          |              | oat-alfalfa                     | 8.5                                                  | CP, FC                         | 3                       | 85-24-135                                               |                           |
| <b>Pasture</b>           | 5+           | alfalfa                         | 11.4                                                 | --                             | 0                       | 0-0-128                                                 | F, M2                     |
|                          |              | pasture                         | 8.4                                                  | --                             | 0                       | 32-1-30                                                 |                           |

<sup>1</sup> Maize: continuous maize, MS: maize-soybean with minimum tillage, MSW: organic maize-soybean-winter wheat, MAAA: maize followed by three years of alfalfa, MOA: organic maize-oat/alfalfa-alfalfa, Pasture: rotationally grazed cool season pasture.

<sup>2</sup> Both grain and straw yields (in parentheses) are reported for wheat.

<sup>3</sup> CP = chisel plow, FC = field cultivator, NT=no-till, RC=row cultivator, RH/TW = rotary hoe or tine-weeder, ST = strip-tillage.

<sup>4</sup> First year availability accounts only for the nutrients released to a growing crop during the same year it is applied. Manure and other organic forms of nutrients contain more total nutrients than are available to the crop in any given year. Legume N credits are not included.

<sup>5</sup> F = fertilizer (conventional or organic according to system management); CPM = composted poultry manure; M1 = applied manure; M2 = manure deposited by grazing livestock.

<sup>6</sup> Between 1993 and 2007 all nutrients for M-S-W were provided by organically approved fertilizers (e.g. 0-0-50) or N fixed by the green manure crop. Starting in 2008 composted pelletized poultry manure was added to the maize and wheat phases of the rotation to supply N, P, K, and micronutrients.

<sup>7</sup> Between 1993 and 2005 the cover crop was red clover (*Trifolium pratense* L.) frost seeded or drilled into winter wheat in early spring; beginning in 2006 this changed to a berseem clover (*Trifolium alexandrinum* L.) oat (*Avena sativa* L.) mixture planted after wheat harvest.

## References

1. R. R. Allmaras, D. R. Linden, C. E. Clapp, Corn-Residue Transformations into Root and Soil Carbon as Related to Nitrogen, Tillage, and Stover Management. *Soil Sci. Soc. Am. J.* (2004) <https://doi.org/10.2136/sssaj2004.1366>.
2. J. M. F. Johnson, R. R. Allmaras, D. C. Reicosky, Estimating source carbon from crop residues, roots and rhizodeposits using the national grain-yield database. *Agron. J.* (2006) <https://doi.org/10.2134/agronj2005.0179>.
3. M. A. Bolinder, H. H. Janzen, E. G. Gregorich, D. A. Angers, A. J. VandenBygaart, An approach for estimating net primary productivity and annual carbon inputs to soil for common agricultural crops in Canada. *Agric. Ecosyst. Environ.* (2007) <https://doi.org/10.1016/j.agee.2006.05.013>.
4. R. Fernández, I. Frasier, E. Noellemeyer, A. Quiroga, Soil quality and productivity under zero tillage and grazing on Mollisols in Argentina – A long-term study. *Geoderma Reg.* (2017) <https://doi.org/10.1016/j.geodrs.2017.09.002>.
5. L. Salvo, J. Hernández, O. Ernst, Distribution of soil organic carbon in different size fractions, under pasture and crop rotations with conventional tillage and no-till systems. *Soil Tillage Res.* (2010) <https://doi.org/10.1016/j.still.2010.05.008>.
6. L. Salvo, J. Hernández, O. Ernst, Soil organic carbon dynamics under different tillage systems in rotations with perennial pastures. *Soil Tillage Res.* (2014) <https://doi.org/10.1016/j.still.2013.08.014>.
7. M. Mandiola, G. A. Studdert, G. F. Domínguez, C. C. Videla, Organic matter distribution in aggregate sizes of a mollisol under contrasting managements. *J. Soil Sci. Plant Nutr.* (2011) <https://doi.org/10.4067/S0718-95162011000400004>.
8. G. F. Domínguez, N. V. Diovisalvi, G. A. Studdert, M. G. Monterubbianesi, Soil organic C and N fractions under continuous cropping with contrasting tillage systems on mollisols of the southeastern Pampas. *Soil Tillage Res.* (2009) <https://doi.org/10.1016/j.still.2008.07.020>.
9. K. P. Fabrizzi, A. Morón, F. O. García, Soil Carbon and Nitrogen Organic Fractions in Degraded vs. Non-Degraded Mollisols in Argentina. *Soil Sci. Soc. Am. J.* (2003) <https://doi.org/10.2136/sssaj2003.1831>.
10. S. N. Tourn, C. C. Videla, G. A. Studdert, Ecological agriculture intensification through crop-pasture rotations does improve aggregation of Southeastern-Pampas Mollisols. *Soil Tillage Res.* (2019) <https://doi.org/10.1016/j.still.2019.104411>.
11. A. M. Cates, M. D. Ruark, J. L. Hedtcke, J. L. Posner, Long-term tillage, rotation and perennialization effects on particulate and aggregate soil organic matter. *Soil Tillage Res.* (2016) <https://doi.org/10.1016/j.still.2015.09.008>.
12. P. A. Lazicki, M. Liebman, M. M. Wander, Root parameters show how management alters resource distribution and soil quality in conventional and low-input cropping systems in central Iowa. *PLoS One* (2016) <https://doi.org/10.1371/journal.pone.0164209>.
13. M. M. Wander, W. Yun, W. A. Goldstein, S. Aref, S. A. Khan, Organic N and particulate organic matter fractions in organic and conventional farming systems with a history of manure application. *Plant Soil* (2007) <https://doi.org/10.1007/s11104-007-9198-4>.
14. A. E. Russell, D. A. Laird, T. B. Parkin, A. P. Mallarino, Impact of Nitrogen Fertilization and Cropping System on Carbon Sequestration in Midwestern Mollisols. *Soil Sci. Soc. Am. J.* (2005) <https://doi.org/10.2136/sssaj2005.0413>.
15. H. J. Poffenbarger, *et al.*, Whole-profile soil organic matter content, composition, and stability under cropping systems that differ in belowground inputs. *Agric. Ecosyst. Environ.* (2020) <https://doi.org/10.1016/j.agee.2019.106810>.
16. M. J. Beltrán, H. Sainz-Rozas, J. A. Galantini, R. I. Romaniuk, P. Barbieri, Cover crops in the Southeastern region of Buenos Aires, Argentina: effects on organic matter physical fractions and nutrient availability. *Environ. Earth Sci.* (2018) <https://doi.org/10.1007/s12665-018-7606-0>.
17. H. Jiang, X. Han, W. Zou, X. Hao, B. Zhang, Seasonal and long-term changes in soil physical properties and organic carbon fractions as affected by manure application rates

- in the Mollisol region of Northeast China. *Agric. Ecosyst. Environ.* (2018) <https://doi.org/10.1016/j.agee.2018.09.007>.
18. P. K. Pant, S. Ram, P. Bhatt, A. Mishra, V. Singh, Vertical distribution of different pools of soil organic carbon under long-term fertilizer experiment on rice-wheat sequence in mollisols of North India. *Commun. Soil Sci. Plant Anal.* (2021) <https://doi.org/10.1080/00103624.2020.1859527>.
  19. S. Qiu, *et al.*, Changes in soil carbon and nitrogen pools in a Mollisol after long-term fallow or application of chemical fertilizers, straw or manures. *Soil Tillage Res.* (2016) <https://doi.org/10.1016/j.still.2016.07.002>.
  20. S. Miao, Y. Qiao, P. Li, X. Han, C. Tang, Fallow associated with autumn-plough favors structure stability and storage of soil organic carbon compared to continuous maize cropping in Mollisols. *Plant Soil* (2017) <https://doi.org/10.1007/s11104-017-3187-z>.
  21. M. E. Duval, J. A. Galantini, J. M. Martínez, F. M. López, L. G. Wall, Sensitivity of different soil quality indicators to assess sustainable land management: Influence of site features and seasonality. *Soil Tillage Res.* (2016) <https://doi.org/10.1016/j.still.2016.01.004>.
